# Supplementary material for: Genome-Wide Analysis of NLR Disease Resistance Genes in an Updated Reference Genome of Barley
Source: Front Genet. 2021 May 24;12:694682. doi: 10.3389/fgene.2021.694682 (PMC8181414; doi:10.3389/fgene.2021.694682)
Supplement: Supplementary Table 1 — Detailed features of NLR genes identified from barley genome. [file Table_1.XLS]

## Sheet: Table S1
Table S1. Detailed features of NLR genes identified from barley genome.
Classification	Subclass	Gene Identifier	Singleton/Cluster	No. of Genes in Cluster	Copy types
CNL	N	Hordeum_vulgare_HORVU.MOREX.r3.1HG0000210.1	C	3	Tandem
CNL	N	Hordeum_vulgare_HORVU.MOREX.r3.1HG0000220.1			Tandem
CNL	CN	Hordeum_vulgare_HORVU.MOREX.r3.1HG0000250.1			Proximal
CNL	N	Hordeum_vulgare_HORVU.MOREX.r3.1HG0000520.1	S	1	Dispersed
CNL	CN	Hordeum_vulgare_HORVU.MOREX.r3.1HG0000990.1	C	4	Proximal
CNL	CN	Hordeum_vulgare_HORVU.MOREX.r3.1HG0001010.1			Tandem
CNL	CNL	Hordeum_vulgare_HORVU.MOREX.r3.1HG0001020.1			Tandem
CNL	CN	Hordeum_vulgare_HORVU.MOREX.r3.1HG0001030.1			Tandem
CNL	N	Hordeum_vulgare_HORVU.MOREX.r3.1HG0001470.1	C	2	WGD or segmental
CNL	CNL	Hordeum_vulgare_HORVU.MOREX.r3.1HG0001510.1			Dispersed
CNL	NL	Hordeum_vulgare_HORVU.MOREX.r3.1HG0001910.1	C	3	WGD or segmental
CNL	NL	Hordeum_vulgare_HORVU.MOREX.r3.1HG0002060.1			Dispersed
CNL	NL	Hordeum_vulgare_HORVU.MOREX.r3.1HG0002180.1			Proximal
CNL	N	Hordeum_vulgare_HORVU.MOREX.r3.1HG0002500.1	S	1	Dispersed
CNL	CNL	Hordeum_vulgare_HORVU.MOREX.r3.1HG0002800.1	C	6	WGD or segmental
CNL	CN	Hordeum_vulgare_HORVU.MOREX.r3.1HG0002950.1			Proximal
CNL	CNL	Hordeum_vulgare_HORVU.MOREX.r3.1HG0002960.1			Dispersed
CNL	CN	Hordeum_vulgare_HORVU.MOREX.r3.1HG0003010.1			WGD or segmental
CNL	CN	Hordeum_vulgare_HORVU.MOREX.r3.1HG0003060.1			Dispersed
CNL	NL	Hordeum_vulgare_HORVU.MOREX.r3.1HG0003070.1			Dispersed
CNL	CNL	Hordeum_vulgare_HORVU.MOREX.r3.1HG0003210.1	C	2	Tandem
CNL	CN	Hordeum_vulgare_HORVU.MOREX.r3.1HG0003230.1			Proximal
CNL	CNL	Hordeum_vulgare_HORVU.MOREX.r3.1HG0003260.1	S	1	Proximal
CNL	N	Hordeum_vulgare_HORVU.MOREX.r3.1HG0004040.1	S	1	Dispersed
CNL	CNL	Hordeum_vulgare_HORVU.MOREX.r3.1HG0004300.1	C	8	Proximal
CNL	CNL	Hordeum_vulgare_HORVU.MOREX.r3.1HG0004340.1			Proximal
CNL	NL	Hordeum_vulgare_HORVU.MOREX.r3.1HG0004370.1			Proximal
CNL	CN	Hordeum_vulgare_HORVU.MOREX.r3.1HG0004380.1			Dispersed
CNL	CNL	Hordeum_vulgare_HORVU.MOREX.r3.1HG0004410.1			Dispersed
CNL	NL	Hordeum_vulgare_HORVU.MOREX.r3.1HG0004450.1			Dispersed
CNL	CN	Hordeum_vulgare_HORVU.MOREX.r3.1HG0004460.1			Dispersed
CNL	CNL	Hordeum_vulgare_HORVU.MOREX.r3.1HG0004490.1			Dispersed
CNL	N	Hordeum_vulgare_HORVU.MOREX.r3.1HG0005640.1	S	1	Dispersed
CNL	CNL	Hordeum_vulgare_HORVU.MOREX.r3.1HG0006160.1	C	2	Proximal
CNL	CNL	Hordeum_vulgare_HORVU.MOREX.r3.1HG0006230.1			Tandem
CNL	CNL	Hordeum_vulgare_HORVU.MOREX.r3.1HG0006420.1	S	1	Dispersed
CNL	CN	Hordeum_vulgare_HORVU.MOREX.r3.1HG0006880.1	S	1	Dispersed
CNL	N	Hordeum_vulgare_HORVU.MOREX.r3.1HG0010020.1	C	2	Dispersed
CNL	N	Hordeum_vulgare_HORVU.MOREX.r3.1HG0010030.1			Dispersed
CNL	CNL	Hordeum_vulgare_HORVU.MOREX.r3.1HG0012170.1	S	1	Dispersed
CNL	CN	Hordeum_vulgare_HORVU.MOREX.r3.1HG0012650.1	C	2	Proximal
CNL	CNL	Hordeum_vulgare_HORVU.MOREX.r3.1HG0012670.1			Proximal
CNL	N	Hordeum_vulgare_HORVU.MOREX.r3.1HG0021100.1	C	3	Proximal
CNL	CN	Hordeum_vulgare_HORVU.MOREX.r3.1HG0021110.1			Proximal
CNL	CN	Hordeum_vulgare_HORVU.MOREX.r3.1HG0021150.1			Proximal
CNL	CN	Hordeum_vulgare_HORVU.MOREX.r3.1HG0022330.1	S	1	Dispersed
CNL	CNL	Hordeum_vulgare_HORVU.MOREX.r3.1HG0042290.1	S	1	Dispersed
CNL	CN	Hordeum_vulgare_HORVU.MOREX.r3.1HG0045390.1	S	1	Dispersed
CNL	NL	Hordeum_vulgare_HORVU.MOREX.r3.1HG0047150.1	S	1	Dispersed
CNL	N	Hordeum_vulgare_HORVU.MOREX.r3.1HG0047420.1	S	1	Dispersed
CNL	NL	Hordeum_vulgare_HORVU.MOREX.r3.1HG0063100.1	C	2	Dispersed
CNL	NL	Hordeum_vulgare_HORVU.MOREX.r3.1HG0063110.1			Dispersed
CNL	CNL	Hordeum_vulgare_HORVU.MOREX.r3.1HG0066210.1	S	1	Dispersed
CNL	CN	Hordeum_vulgare_HORVU.MOREX.r3.1HG0069630.1	S	1	WGD or segmental
CNL	CN	Hordeum_vulgare_HORVU.MOREX.r3.1HG0076190.1	S	1	Dispersed
CNL	CNL	Hordeum_vulgare_HORVU.MOREX.r3.1HG0079920.1	S	1	Dispersed
CNL	N	Hordeum_vulgare_HORVU.MOREX.r3.1HG0081650.1	C	3	WGD or segmental
CNL	N	Hordeum_vulgare_HORVU.MOREX.r3.1HG0081680.1			Tandem
CNL	N	Hordeum_vulgare_HORVU.MOREX.r3.1HG0081690.1			Tandem
CNL	CN	Hordeum_vulgare_HORVU.MOREX.r3.1HG0083670.1	C	2	Proximal
CNL	CN	Hordeum_vulgare_HORVU.MOREX.r3.1HG0083690.1			Proximal
CNL	CNL-V-ATPase_G_2	Hordeum_vulgare_HORVU.MOREX.r3.1HG0084090.1	S	1	Dispersed
CNL	N	Hordeum_vulgare_HORVU.MOREX.r3.1HG0084590.1	C	6	Tandem
CNL	NL	Hordeum_vulgare_HORVU.MOREX.r3.1HG0084600.1			Tandem
CNL	NL	Hordeum_vulgare_HORVU.MOREX.r3.1HG0084610.1			Tandem
CNL	N	Hordeum_vulgare_HORVU.MOREX.r3.1HG0084620.1			Tandem
CNL	N	Hordeum_vulgare_HORVU.MOREX.r3.1HG0084790.1			Dispersed
CNL	CN	Hordeum_vulgare_HORVU.MOREX.r3.1HG0084900.1			Dispersed
CNL	CN	Hordeum_vulgare_HORVU.MOREX.r3.1HG0086430.1	C	2	Proximal
CNL	CNL	Hordeum_vulgare_HORVU.MOREX.r3.1HG0086450.1			Proximal
CNL	N	Hordeum_vulgare_HORVU.MOREX.r3.1HG0090170.1	C	4	Proximal
CNL	CN	Hordeum_vulgare_HORVU.MOREX.r3.1HG0090180.1			Proximal
CNL	CNL	Hordeum_vulgare_HORVU.MOREX.r3.1HG0090200.1			Proximal
CNL	CN	Hordeum_vulgare_HORVU.MOREX.r3.1HG0090290.1			Dispersed
CNL	CN	Hordeum_vulgare_HORVU.MOREX.r3.1HG0090630.1	S	1	Dispersed
CNL	CNL	Hordeum_vulgare_HORVU.MOREX.r3.1HG0093120.1	C	2	Tandem
CNL	CNL	Hordeum_vulgare_HORVU.MOREX.r3.1HG0093130.1			Tandem
CNL	CN	Hordeum_vulgare_HORVU.MOREX.r3.2HG0095930.1	C	4	Proximal
CNL	CN-PPP1R42	Hordeum_vulgare_HORVU.MOREX.r3.2HG0095950.1			Tandem
CNL	CN	Hordeum_vulgare_HORVU.MOREX.r3.2HG0095960.1			Tandem
CNL	CN	Hordeum_vulgare_HORVU.MOREX.r3.2HG0096080.1			Dispersed
CNL	CN	Hordeum_vulgare_HORVU.MOREX.r3.2HG0096460.1	C	2	Proximal
CNL	N	Hordeum_vulgare_HORVU.MOREX.r3.2HG0096490.1			Proximal
CNL	CNL	Hordeum_vulgare_HORVU.MOREX.r3.2HG0097510.1	C	2	Proximal
CNL	CN	Hordeum_vulgare_HORVU.MOREX.r3.2HG0097560.1			Proximal
CNL	N	Hordeum_vulgare_HORVU.MOREX.r3.2HG0098130.1	S	1	Dispersed
CNL	CN-Exo70	Hordeum_vulgare_HORVU.MOREX.r3.2HG0098620.1	C	2	Dispersed
CNL	CN	Hordeum_vulgare_HORVU.MOREX.r3.2HG0098640.1			Tandem
CNL	CNL	Hordeum_vulgare_HORVU.MOREX.r3.2HG0099120.1	C	2	Proximal
CNL	CNL	Hordeum_vulgare_HORVU.MOREX.r3.2HG0099140.1			Proximal
CNL	CN	Hordeum_vulgare_HORVU.MOREX.r3.2HG0100630.1	S	1	Dispersed
CNL	N	Hordeum_vulgare_HORVU.MOREX.r3.2HG0100960.1	C	4	Proximal
CNL	CNL	Hordeum_vulgare_HORVU.MOREX.r3.2HG0100980.1			Tandem
CNL	met_CoM_red_A2-N	Hordeum_vulgare_HORVU.MOREX.r3.2HG0100990.1			Proximal
CNL	NL	Hordeum_vulgare_HORVU.MOREX.r3.2HG0101020.1			Proximal
CNL	CNL	Hordeum_vulgare_HORVU.MOREX.r3.2HG0101580.1	C	2	Proximal
CNL	CN	Hordeum_vulgare_HORVU.MOREX.r3.2HG0101600.1			Proximal
CNL	N	Hordeum_vulgare_HORVU.MOREX.r3.2HG0101980.1	S	1	Dispersed
CNL	CN	Hordeum_vulgare_HORVU.MOREX.r3.2HG0102530.1	S	1	Dispersed
CNL	CNL	Hordeum_vulgare_HORVU.MOREX.r3.2HG0104990.1	S	1	Dispersed
CNL	CN-AUX_IAA	Hordeum_vulgare_HORVU.MOREX.r3.2HG0105320.1	S	1	Dispersed
CNL	CN-MDN1	Hordeum_vulgare_HORVU.MOREX.r3.2HG0105900.1	S	1	Dispersed
CNL	CNL-Jacalin	Hordeum_vulgare_HORVU.MOREX.r3.2HG0106240.1	S	1	Dispersed
CNL	CN	Hordeum_vulgare_HORVU.MOREX.r3.2HG0113210.1	S	1	Dispersed
CNL	CN	Hordeum_vulgare_HORVU.MOREX.r3.2HG0116820.1	S	1	Dispersed
CNL	CNL	Hordeum_vulgare_HORVU.MOREX.r3.2HG0128070.1	S	1	Proximal
CNL	CNL	Hordeum_vulgare_HORVU.MOREX.r3.2HG0132330.1	S	1	Dispersed
CNL	CNL	Hordeum_vulgare_HORVU.MOREX.r3.2HG0132990.1	S	1	Dispersed
CNL	N	Hordeum_vulgare_HORVU.MOREX.r3.2HG0157300.1	S	1	Dispersed
CNL	CNL	Hordeum_vulgare_HORVU.MOREX.r3.2HG0180250.1	S	1	Dispersed
CNL	NL	Hordeum_vulgare_HORVU.MOREX.r3.2HG0181540.1	S	1	Dispersed
CNL	N	Hordeum_vulgare_HORVU.MOREX.r3.2HG0183990.1	S	1	Dispersed
CNL	CNL	Hordeum_vulgare_HORVU.MOREX.r3.2HG0189970.1	S	1	Dispersed
CNL	N	Hordeum_vulgare_HORVU.MOREX.r3.2HG0193290.1	S	1	Dispersed
CNL	ZnF_BED-N	Hordeum_vulgare_HORVU.MOREX.r3.2HG0194910.1	C	3	Proximal
CNL	CN	Hordeum_vulgare_HORVU.MOREX.r3.2HG0194970.1			Proximal
CNL	CN	Hordeum_vulgare_HORVU.MOREX.r3.2HG0195070.1			Dispersed
CNL	CN	Hordeum_vulgare_HORVU.MOREX.r3.2HG0198090.1	C	4	Tandem
CNL	CN	Hordeum_vulgare_HORVU.MOREX.r3.2HG0198100.1			Tandem
CNL	CN	Hordeum_vulgare_HORVU.MOREX.r3.2HG0198110.1			Tandem
CNL	CN	Hordeum_vulgare_HORVU.MOREX.r3.2HG0198130.1			Proximal
CNL	CNL	Hordeum_vulgare_HORVU.MOREX.r3.2HG0199120.1	C	2	Dispersed
CNL	CN	Hordeum_vulgare_HORVU.MOREX.r3.2HG0199150.1			Dispersed
CNL	CN	Hordeum_vulgare_HORVU.MOREX.r3.2HG0202820.1	C	2	Dispersed
CNL	N	Hordeum_vulgare_HORVU.MOREX.r3.2HG0202830.1			Dispersed
CNL	N	Hordeum_vulgare_HORVU.MOREX.r3.2HG0207180.1	S	1	Dispersed
CNL	CN	Hordeum_vulgare_HORVU.MOREX.r3.2HG0209880.1	S	1	Dispersed
CNL	CNL	Hordeum_vulgare_HORVU.MOREX.r3.2HG0210300.1	S	1	Dispersed
CNL	CN-Jacalin	Hordeum_vulgare_HORVU.MOREX.r3.2HG0213360.1	S	1	Dispersed
CNL	N	Hordeum_vulgare_HORVU.MOREX.r3.2HG0214240.1	C	2	Dispersed
CNL	CNL	Hordeum_vulgare_HORVU.MOREX.r3.2HG0214310.1			Dispersed
CNL	SapF-N	Hordeum_vulgare_HORVU.MOREX.r3.2HG0216380.1	S	1	Dispersed
CNL	CN	Hordeum_vulgare_HORVU.MOREX.r3.2HG0216800.1	C	3	Proximal
CNL	N	Hordeum_vulgare_HORVU.MOREX.r3.2HG0216830.1			Proximal
CNL	CN	Hordeum_vulgare_HORVU.MOREX.r3.2HG0216880.1			Proximal
CNL	CNL	Hordeum_vulgare_HORVU.MOREX.r3.2HG0217840.1	S	1	Dispersed
CNL	CN	Hordeum_vulgare_HORVU.MOREX.r3.3HG0219470.1	C	2	Dispersed
CNL	CN-TRX	Hordeum_vulgare_HORVU.MOREX.r3.3HG0219490.1			Dispersed
CNL	CNL	Hordeum_vulgare_HORVU.MOREX.r3.3HG0219750.1	C	2	Dispersed
CNL	CNL	Hordeum_vulgare_HORVU.MOREX.r3.3HG0219860.1			Dispersed
CNL	CNL	Hordeum_vulgare_HORVU.MOREX.r3.3HG0220340.1	S	1	Dispersed
CNL	CNL	Hordeum_vulgare_HORVU.MOREX.r3.3HG0220360.1	S	1	Dispersed
CNL	CNL	Hordeum_vulgare_HORVU.MOREX.r3.3HG0222080.1	S	1	Dispersed
CNL	CN	Hordeum_vulgare_HORVU.MOREX.r3.3HG0222490.1	S	1	Dispersed
CNL	CN	Hordeum_vulgare_HORVU.MOREX.r3.3HG0223170.1	S	1	Proximal
CNL	CN	Hordeum_vulgare_HORVU.MOREX.r3.3HG0224870.1	C	2	Dispersed
CNL	N	Hordeum_vulgare_HORVU.MOREX.r3.3HG0224880.1			Dispersed
CNL	CN	Hordeum_vulgare_HORVU.MOREX.r3.3HG0225300.1	S	1	Dispersed
CNL	CN	Hordeum_vulgare_HORVU.MOREX.r3.3HG0227880.1	S	1	Dispersed
CNL	N	Hordeum_vulgare_HORVU.MOREX.r3.3HG0228390.1	C	2	Dispersed
CNL	CN-RIP	Hordeum_vulgare_HORVU.MOREX.r3.3HG0228400.1			Dispersed
CNL	CNL	Hordeum_vulgare_HORVU.MOREX.r3.3HG0229690.1	C	5	Dispersed
CNL	CN	Hordeum_vulgare_HORVU.MOREX.r3.3HG0229810.1			Proximal
CNL	NL	Hordeum_vulgare_HORVU.MOREX.r3.3HG0229840.1			Proximal
CNL	CN	Hordeum_vulgare_HORVU.MOREX.r3.3HG0229870.1			Proximal
CNL	CN	Hordeum_vulgare_HORVU.MOREX.r3.3HG0229880.1			Proximal
CNL	CNL	Hordeum_vulgare_HORVU.MOREX.r3.3HG0229980.1	C	3	Proximal
CNL	CNL	Hordeum_vulgare_HORVU.MOREX.r3.3HG0230030.1			Tandem
CNL	CNL	Hordeum_vulgare_HORVU.MOREX.r3.3HG0230060.1			Proximal
CNL	CN	Hordeum_vulgare_HORVU.MOREX.r3.3HG0230500.1	C	2	Proximal
CNL	CNL	Hordeum_vulgare_HORVU.MOREX.r3.3HG0230520.1			Proximal
CNL	CNL	Hordeum_vulgare_HORVU.MOREX.r3.3HG0231840.1	C	5	Tandem
CNL	CN	Hordeum_vulgare_HORVU.MOREX.r3.3HG0231850.1			Tandem
CNL	NL	Hordeum_vulgare_HORVU.MOREX.r3.3HG0231860.1			Proximal
CNL	CN	Hordeum_vulgare_HORVU.MOREX.r3.3HG0231870.1			Proximal
CNL	N	Hordeum_vulgare_HORVU.MOREX.r3.3HG0231880.1			Proximal
CNL	CNL	Hordeum_vulgare_HORVU.MOREX.r3.3HG0232120.1	S	1	Dispersed
CNL	CNL	Hordeum_vulgare_HORVU.MOREX.r3.3HG0234370.1	S	1	Dispersed
CNL	CNL	Hordeum_vulgare_HORVU.MOREX.r3.3HG0234700.1	S	1	Dispersed
CNL	CN	Hordeum_vulgare_HORVU.MOREX.r3.3HG0255750.1	S	1	Dispersed
CNL	CN	Hordeum_vulgare_HORVU.MOREX.r3.3HG0285660.1	C	2	WGD or segmental
CNL	CN	Hordeum_vulgare_HORVU.MOREX.r3.3HG0285710.1			Proximal
CNL	CN	Hordeum_vulgare_HORVU.MOREX.r3.3HG0293670.1	S	1	Dispersed
CNL	NL	Hordeum_vulgare_HORVU.MOREX.r3.3HG0294430.1	S	1	Dispersed
CNL	CN	Hordeum_vulgare_HORVU.MOREX.r3.3HG0295670.1	S	1	WGD or segmental
CNL	NL	Hordeum_vulgare_HORVU.MOREX.r3.3HG0310700.1	S	1	Dispersed
CNL	CN	Hordeum_vulgare_HORVU.MOREX.r3.3HG0311640.1	C	2	Dispersed
CNL	N	Hordeum_vulgare_HORVU.MOREX.r3.3HG0311720.1			Dispersed
CNL	CNL	Hordeum_vulgare_HORVU.MOREX.r3.3HG0312780.1	S	1	Dispersed
CNL	CN	Hordeum_vulgare_HORVU.MOREX.r3.3HG0313740.1	S	1	Dispersed
CNL	CNL	Hordeum_vulgare_HORVU.MOREX.r3.3HG0315170.1	S	1	Dispersed
CNL	CN	Hordeum_vulgare_HORVU.MOREX.r3.3HG0315540.1	C	2	Proximal
CNL	CNL	Hordeum_vulgare_HORVU.MOREX.r3.3HG0315570.1			Proximal
CNL	CN	Hordeum_vulgare_HORVU.MOREX.r3.3HG0316230.1	C	3	Tandem
CNL	CN	Hordeum_vulgare_HORVU.MOREX.r3.3HG0316240.1			Tandem
CNL	CNL	Hordeum_vulgare_HORVU.MOREX.r3.3HG0316460.1			Tandem
CNL	CNL	Hordeum_vulgare_HORVU.MOREX.r3.3HG0318230.1	S	1	Tandem
CNL	CN	Hordeum_vulgare_HORVU.MOREX.r3.3HG0318420.1	C	2	Proximal
CNL	CNL	Hordeum_vulgare_HORVU.MOREX.r3.3HG0318450.1			Proximal
CNL	CN	Hordeum_vulgare_HORVU.MOREX.r3.3HG0320310.1	S	1	Dispersed
CNL	N-DnaA	Hordeum_vulgare_HORVU.MOREX.r3.3HG0321310.1	C	2	Dispersed
CNL	NL	Hordeum_vulgare_HORVU.MOREX.r3.3HG0321320.1			Dispersed
CNL	N	Hordeum_vulgare_HORVU.MOREX.r3.3HG0322610.1	S	1	Dispersed
CNL	CN	Hordeum_vulgare_HORVU.MOREX.r3.3HG0324290.1	C	2	Proximal
CNL	CN	Hordeum_vulgare_HORVU.MOREX.r3.3HG0324310.1			Proximal
CNL	CN	Hordeum_vulgare_HORVU.MOREX.r3.3HG0326090.1	S	1	Dispersed
CNL	CN	Hordeum_vulgare_HORVU.MOREX.r3.3HG0326900.1	C	6	Dispersed
CNL	N	Hordeum_vulgare_HORVU.MOREX.r3.3HG0327030.1			Proximal
CNL	CN	Hordeum_vulgare_HORVU.MOREX.r3.3HG0327070.1			Proximal
CNL	CNL	Hordeum_vulgare_HORVU.MOREX.r3.3HG0327080.1			Proximal
CNL	CN	Hordeum_vulgare_HORVU.MOREX.r3.3HG0327090.1			Proximal
CNL	CN	Hordeum_vulgare_HORVU.MOREX.r3.3HG0327120.1			Proximal
CNL	CN	Hordeum_vulgare_HORVU.MOREX.r3.3HG0329840.1	S	1	Dispersed
CNL	CNL	Hordeum_vulgare_HORVU.MOREX.r3.4HG0331810.1	C	3	Proximal
CNL	CNL	Hordeum_vulgare_HORVU.MOREX.r3.4HG0331840.1			Proximal
CNL	CN	Hordeum_vulgare_HORVU.MOREX.r3.4HG0331870.1			Tandem
CNL	PKc_like-CN	Hordeum_vulgare_HORVU.MOREX.r3.4HG0344820.1	C	3	Tandem
CNL	CNL	Hordeum_vulgare_HORVU.MOREX.r3.4HG0344830.1			Tandem
CNL	CNL	Hordeum_vulgare_HORVU.MOREX.r3.4HG0344950.1			Dispersed
CNL	CN	Hordeum_vulgare_HORVU.MOREX.r3.4HG0344990.1	C	2	Dispersed
CNL	CN-PKc_like	Hordeum_vulgare_HORVU.MOREX.r3.4HG0345000.1			Dispersed
CNL	N	Hordeum_vulgare_HORVU.MOREX.r3.4HG0349800.1	S	1	Dispersed
CNL	N	Hordeum_vulgare_HORVU.MOREX.r3.4HG0352270.1	S	1	Dispersed
CNL	NL	Hordeum_vulgare_HORVU.MOREX.r3.4HG0391180.1	S	1	Dispersed
CNL	CN	Hordeum_vulgare_HORVU.MOREX.r3.4HG0407780.1	S	1	Dispersed
CNL	CN	Hordeum_vulgare_HORVU.MOREX.r3.4HG0412930.1	S	1	Dispersed
CNL	CNL	Hordeum_vulgare_HORVU.MOREX.r3.4HG0413780.1	S	1	Dispersed
CNL	CN	Hordeum_vulgare_HORVU.MOREX.r3.4HG0414430.1	S	1	Dispersed
CNL	CN	Hordeum_vulgare_HORVU.MOREX.r3.4HG0415260.1	S	1	Dispersed
CNL	PKc_like-NL	Hordeum_vulgare_HORVU.MOREX.r3.5HG0420380.1	S	1	Dispersed
CNL	CN-LSD1	Hordeum_vulgare_HORVU.MOREX.r3.5HG0420450.1	C	2	Dispersed
CNL	CN	Hordeum_vulgare_HORVU.MOREX.r3.5HG0420460.1			Dispersed
CNL	CN	Hordeum_vulgare_HORVU.MOREX.r3.5HG0423930.1	S	1	Dispersed
CNL	CN	Hordeum_vulgare_HORVU.MOREX.r3.5HG0424980.1	S	1	Dispersed
CNL	CN	Hordeum_vulgare_HORVU.MOREX.r3.5HG0425160.1	C	6	Proximal
CNL	N	Hordeum_vulgare_HORVU.MOREX.r3.5HG0425230.1			Proximal
CNL	CN	Hordeum_vulgare_HORVU.MOREX.r3.5HG0425250.1			Proximal
CNL	CN	Hordeum_vulgare_HORVU.MOREX.r3.5HG0425290.1			Proximal
CNL	CN	Hordeum_vulgare_HORVU.MOREX.r3.5HG0425330.1			Proximal
CNL	CN	Hordeum_vulgare_HORVU.MOREX.r3.5HG0425370.1			Proximal
CNL	CNL	Hordeum_vulgare_HORVU.MOREX.r3.5HG0426110.1	C	2	Dispersed
CNL	CN	Hordeum_vulgare_HORVU.MOREX.r3.5HG0426160.1			Dispersed
CNL	N	Hordeum_vulgare_HORVU.MOREX.r3.5HG0426330.1	S	1	Dispersed
CNL	CN-AMN1	Hordeum_vulgare_HORVU.MOREX.r3.5HG0438310.1	S	1	Dispersed
RNL	N	Hordeum_vulgare_HORVU.MOREX.r3.5HG0438750.1	S	1	Dispersed
CNL	N	Hordeum_vulgare_HORVU.MOREX.r3.5HG0438930.1	S	1	Dispersed
CNL	CNL	Hordeum_vulgare_HORVU.MOREX.r3.5HG0439860.1	S	1	Dispersed
CNL	CNL	Hordeum_vulgare_HORVU.MOREX.r3.5HG0443300.1	S	1	Dispersed
CNL	NL	Hordeum_vulgare_HORVU.MOREX.r3.5HG0472840.1	S	1	Proximal
CNL	NL	Hordeum_vulgare_HORVU.MOREX.r3.5HG0472870.1	S	1	Proximal
CNL	CNL	Hordeum_vulgare_HORVU.MOREX.r3.5HG0473930.1	C	2	Proximal
CNL	CN-PKc_like	Hordeum_vulgare_HORVU.MOREX.r3.5HG0473950.1			Proximal
CNL	CNL	Hordeum_vulgare_HORVU.MOREX.r3.5HG0475900.1	S	1	Tandem
CNL	N	Hordeum_vulgare_HORVU.MOREX.r3.5HG0476850.1	S	1	Dispersed
CNL	CN	Hordeum_vulgare_HORVU.MOREX.r3.5HG0479430.1	S	1	Dispersed
CNL	CNL	Hordeum_vulgare_HORVU.MOREX.r3.5HG0480870.1	S	1	Dispersed
CNL	N-Jacalin	Hordeum_vulgare_HORVU.MOREX.r3.5HG0482110.1	S	1	Tandem
CNL	CNL	Hordeum_vulgare_HORVU.MOREX.r3.5HG0486600.1	S	1	Dispersed
CNL	CN	Hordeum_vulgare_HORVU.MOREX.r3.5HG0490310.1	S	1	Dispersed
CNL	N	Hordeum_vulgare_HORVU.MOREX.r3.5HG0491670.1	C	2	Dispersed
CNL	CN	Hordeum_vulgare_HORVU.MOREX.r3.5HG0491680.1			Dispersed
CNL	N	Hordeum_vulgare_HORVU.MOREX.r3.5HG0495560.1	S	1	Tandem
CNL	CN	Hordeum_vulgare_HORVU.MOREX.r3.5HG0496180.1	S	1	Dispersed
CNL	CN	Hordeum_vulgare_HORVU.MOREX.r3.5HG0496820.1	S	1	Dispersed
CNL	CNL	Hordeum_vulgare_HORVU.MOREX.r3.5HG0501830.1	C	2	Proximal
CNL	CNL	Hordeum_vulgare_HORVU.MOREX.r3.5HG0501880.1			Tandem
CNL	CN	Hordeum_vulgare_HORVU.MOREX.r3.5HG0502300.1	C	3	Dispersed
CNL	PTZ00449-CNL-WRKY	Hordeum_vulgare_HORVU.MOREX.r3.5HG0502310.1			Proximal
CNL	CNL-bHLH_AtbHLH_like	Hordeum_vulgare_HORVU.MOREX.r3.5HG0502370.1			Proximal
CNL	CN	Hordeum_vulgare_HORVU.MOREX.r3.5HG0507200.1	S	1	Dispersed
CNL	CN	Hordeum_vulgare_HORVU.MOREX.r3.5HG0509410.1	S	1	Dispersed
CNL	CNL	Hordeum_vulgare_HORVU.MOREX.r3.5HG0511960.1	C	3	Tandem
CNL	CN	Hordeum_vulgare_HORVU.MOREX.r3.5HG0511970.1			Tandem
CNL	CNL	Hordeum_vulgare_HORVU.MOREX.r3.5HG0512000.1			Dispersed
CNL	N	Hordeum_vulgare_HORVU.MOREX.r3.5HG0514010.1	S	1	Dispersed
CNL	CNL	Hordeum_vulgare_HORVU.MOREX.r3.5HG0514590.1	S	1	Dispersed
CNL	CN	Hordeum_vulgare_HORVU.MOREX.r3.5HG0519480.1	S	1	Dispersed
CNL	NL-PP2Cc	Hordeum_vulgare_HORVU.MOREX.r3.5HG0526140.1	C	2	Dispersed
CNL	CN	Hordeum_vulgare_HORVU.MOREX.r3.5HG0526160.1			Dispersed
CNL	PKc_like-N	Hordeum_vulgare_HORVU.MOREX.r3.5HG0526460.1	S	1	Dispersed
CNL	CN	Hordeum_vulgare_HORVU.MOREX.r3.5HG0528050.1	S	1	Dispersed
CNL	CN	Hordeum_vulgare_HORVU.MOREX.r3.5HG0529450.1	S	1	Tandem
CNL	CN	Hordeum_vulgare_HORVU.MOREX.r3.5HG0529550.1	S	1	Dispersed
CNL	PKc_like-CN-zf-FLZ	Hordeum_vulgare_HORVU.MOREX.r3.5HG0531040.1	C	2	Dispersed
CNL	CN	Hordeum_vulgare_HORVU.MOREX.r3.5HG0531050.1			Dispersed
CNL	CN	Hordeum_vulgare_HORVU.MOREX.r3.5HG0533920.1	S	1	Dispersed
CNL	CN	Hordeum_vulgare_HORVU.MOREX.r3.5HG0534530.1	C	2	Dispersed
CNL	CN-B3	Hordeum_vulgare_HORVU.MOREX.r3.5HG0534540.1			Dispersed
CNL	CN	Hordeum_vulgare_HORVU.MOREX.r3.5HG0534670.1	S	1	Dispersed
CNL	N	Hordeum_vulgare_HORVU.MOREX.r3.5HG0534940.1	C	2	Dispersed
CNL	ZnF_BED-N	Hordeum_vulgare_HORVU.MOREX.r3.5HG0534980.1			Dispersed
CNL	CN	Hordeum_vulgare_HORVU.MOREX.r3.5HG0535280.1	S	1	Dispersed
CNL	CN	Hordeum_vulgare_HORVU.MOREX.r3.5HG0535870.1	S	1	Dispersed
CNL	CNL	Hordeum_vulgare_HORVU.MOREX.r3.5HG0537570.1	S	1	Dispersed
CNL	CN	Hordeum_vulgare_HORVU.MOREX.r3.5HG0537680.1	S	1	Dispersed
CNL	N	Hordeum_vulgare_HORVU.MOREX.r3.5HG0537840.1	S	1	Dispersed
CNL	CN-Sin3	Hordeum_vulgare_HORVU.MOREX.r3.6HG0540710.1	C	2	Tandem
CNL	CNL	Hordeum_vulgare_HORVU.MOREX.r3.6HG0540720.1			Tandem
CNL	N	Hordeum_vulgare_HORVU.MOREX.r3.6HG0542160.1	S	1	Dispersed
CNL	CNL	Hordeum_vulgare_HORVU.MOREX.r3.6HG0543480.1	S	1	Dispersed
CNL	N	Hordeum_vulgare_HORVU.MOREX.r3.6HG0544110.1	S	1	Proximal
CNL	N	Hordeum_vulgare_HORVU.MOREX.r3.6HG0546010.1	S	1	Dispersed
CNL	CNL	Hordeum_vulgare_HORVU.MOREX.r3.6HG0546230.1	S	1	Dispersed
CNL	CNL-DDE_Tnp_4	Hordeum_vulgare_HORVU.MOREX.r3.6HG0546910.1	C	8	Proximal
CNL	CNL-DDE_Tnp_4	Hordeum_vulgare_HORVU.MOREX.r3.6HG0546930.1			Proximal
CNL	CN	Hordeum_vulgare_HORVU.MOREX.r3.6HG0546950.1			Proximal
CNL	N	Hordeum_vulgare_HORVU.MOREX.r3.6HG0546960.1			Proximal
CNL	CN	Hordeum_vulgare_HORVU.MOREX.r3.6HG0547010.1			Proximal
CNL	CN-DDE_Tnp_4	Hordeum_vulgare_HORVU.MOREX.r3.6HG0547100.1			Proximal
CNL	CNL-DDE_Tnp_4	Hordeum_vulgare_HORVU.MOREX.r3.6HG0547160.1			Proximal
CNL	CNL-DDE_Tnp_4	Hordeum_vulgare_HORVU.MOREX.r3.6HG0547240.1			Tandem
CNL	N	Hordeum_vulgare_HORVU.MOREX.r3.6HG0547840.1	C	2	Dispersed
CNL	CN	Hordeum_vulgare_HORVU.MOREX.r3.6HG0547850.1			Dispersed
CNL	CN	Hordeum_vulgare_HORVU.MOREX.r3.6HG0550470.1	C	2	Dispersed
CNL	CN	Hordeum_vulgare_HORVU.MOREX.r3.6HG0550480.1			Dispersed
CNL	CN	Hordeum_vulgare_HORVU.MOREX.r3.6HG0551080.1	S	1	Dispersed
CNL	CNL	Hordeum_vulgare_HORVU.MOREX.r3.6HG0551530.1	S	1	Dispersed
CNL	CN	Hordeum_vulgare_HORVU.MOREX.r3.6HG0552680.1	S	1	Dispersed
CNL	CN	Hordeum_vulgare_HORVU.MOREX.r3.6HG0556270.1	C	2	Tandem
CNL	CN	Hordeum_vulgare_HORVU.MOREX.r3.6HG0556280.1			Tandem
CNL	CN	Hordeum_vulgare_HORVU.MOREX.r3.6HG0556330.1	S	1	Proximal
CNL	CN	Hordeum_vulgare_HORVU.MOREX.r3.6HG0558250.1	S	1	Dispersed
CNL	N	Hordeum_vulgare_HORVU.MOREX.r3.6HG0559430.1	C	4	Proximal
CNL	N	Hordeum_vulgare_HORVU.MOREX.r3.6HG0559460.1			Proximal
CNL	NL	Hordeum_vulgare_HORVU.MOREX.r3.6HG0559500.1			Proximal
CNL	CN	Hordeum_vulgare_HORVU.MOREX.r3.6HG0559510.1			Proximal
CNL	CN	Hordeum_vulgare_HORVU.MOREX.r3.6HG0567780.1	S	1	Dispersed
CNL	NL	Hordeum_vulgare_HORVU.MOREX.r3.6HG0570910.1	S	1	Dispersed
CNL	CN	Hordeum_vulgare_HORVU.MOREX.r3.6HG0594450.1	S	1	Dispersed
CNL	N	Hordeum_vulgare_HORVU.MOREX.r3.6HG0601900.1	S	1	Dispersed
CNL	N	Hordeum_vulgare_HORVU.MOREX.r3.6HG0611390.1	S	1	Dispersed
CNL	CNL	Hordeum_vulgare_HORVU.MOREX.r3.6HG0614720.1	S	1	Dispersed
CNL	CNL	Hordeum_vulgare_HORVU.MOREX.r3.6HG0623830.1	S	1	Proximal
CNL	CN	Hordeum_vulgare_HORVU.MOREX.r3.6HG0623860.1	C	2	Tandem
CNL	CN	Hordeum_vulgare_HORVU.MOREX.r3.6HG0623900.1			Dispersed
CNL	CNL	Hordeum_vulgare_HORVU.MOREX.r3.6HG0629160.1	C	3	Tandem
CNL	CNL	Hordeum_vulgare_HORVU.MOREX.r3.6HG0629170.1			Tandem
CNL	CNL	Hordeum_vulgare_HORVU.MOREX.r3.6HG0629180.1			Tandem
CNL	CNL	Hordeum_vulgare_HORVU.MOREX.r3.6HG0629450.1	C	2	Dispersed
CNL	N-STKc_IRAK	Hordeum_vulgare_HORVU.MOREX.r3.6HG0629550.1			Dispersed
CNL	CN	Hordeum_vulgare_HORVU.MOREX.r3.6HG0630620.1	C	4	Tandem
CNL	CN	Hordeum_vulgare_HORVU.MOREX.r3.6HG0630630.1			Tandem
CNL	CN	Hordeum_vulgare_HORVU.MOREX.r3.6HG0630800.1			Dispersed
CNL	CN	Hordeum_vulgare_HORVU.MOREX.r3.6HG0630920.1			Dispersed
CNL	N	Hordeum_vulgare_HORVU.MOREX.r3.6HG0631300.1	C	4	Dispersed
CNL	CNL	Hordeum_vulgare_HORVU.MOREX.r3.6HG0631360.1			Proximal
CNL	CN	Hordeum_vulgare_HORVU.MOREX.r3.6HG0631390.1			Tandem
CNL	CN	Hordeum_vulgare_HORVU.MOREX.r3.6HG0631400.1			Tandem
CNL	CN-PPP1R42	Hordeum_vulgare_HORVU.MOREX.r3.6HG0632390.1	C	3	Tandem
CNL	N	Hordeum_vulgare_HORVU.MOREX.r3.6HG0632400.1			Tandem
CNL	N	Hordeum_vulgare_HORVU.MOREX.r3.6HG0632430.1			Proximal
CNL	CN	Hordeum_vulgare_HORVU.MOREX.r3.6HG0632490.1	C	6	Proximal
CNL	CN	Hordeum_vulgare_HORVU.MOREX.r3.6HG0632530.1			Proximal
CNL	N	Hordeum_vulgare_HORVU.MOREX.r3.6HG0632550.1			Proximal
CNL	CN	Hordeum_vulgare_HORVU.MOREX.r3.6HG0632610.1			Dispersed
CNL	N	Hordeum_vulgare_HORVU.MOREX.r3.6HG0632630.1			Proximal
CNL	CN	Hordeum_vulgare_HORVU.MOREX.r3.6HG0632650.1			Proximal
CNL	CN	Hordeum_vulgare_HORVU.MOREX.r3.6HG0632830.1	C	2	Dispersed
CNL	N	Hordeum_vulgare_HORVU.MOREX.r3.6HG0632840.1			Dispersed
CNL	CN	Hordeum_vulgare_HORVU.MOREX.r3.6HG0633010.1	C	3	Tandem
CNL	CN	Hordeum_vulgare_HORVU.MOREX.r3.6HG0633020.1			Tandem
CNL	CN	Hordeum_vulgare_HORVU.MOREX.r3.6HG0633070.1			Proximal
CNL	N	Hordeum_vulgare_HORVU.MOREX.r3.6HG0633890.1	C	2	Dispersed
CNL	CN	Hordeum_vulgare_HORVU.MOREX.r3.6HG0634000.1			Dispersed
CNL	N-DnaA-NL	Hordeum_vulgare_HORVU.MOREX.r3.6HG0634140.1	S	1	Dispersed
CNL	CN	Hordeum_vulgare_HORVU.MOREX.r3.7HG0634430.1	S	1	Dispersed
CNL	CN	Hordeum_vulgare_HORVU.MOREX.r3.7HG0634520.1	C	5	Proximal
CNL	CN	Hordeum_vulgare_HORVU.MOREX.r3.7HG0634540.1			Proximal
CNL	N	Hordeum_vulgare_HORVU.MOREX.r3.7HG0634640.1			Dispersed
CNL	CN	Hordeum_vulgare_HORVU.MOREX.r3.7HG0634660.1			Proximal
CNL	Thioredoxin_like-CN	Hordeum_vulgare_HORVU.MOREX.r3.7HG0634680.1			Proximal
CNL	Thioredoxin_like-CN	Hordeum_vulgare_HORVU.MOREX.r3.7HG0634870.1	C	4	Proximal
CNL	CN	Hordeum_vulgare_HORVU.MOREX.r3.7HG0634880.1			Proximal
CNL	CN	Hordeum_vulgare_HORVU.MOREX.r3.7HG0634910.1			Proximal
CNL	CN	Hordeum_vulgare_HORVU.MOREX.r3.7HG0634930.1			Proximal
CNL	CN	Hordeum_vulgare_HORVU.MOREX.r3.7HG0634990.1	C	4	Dispersed
CNL	CN	Hordeum_vulgare_HORVU.MOREX.r3.7HG0635010.1			Dispersed
CNL	CN	Hordeum_vulgare_HORVU.MOREX.r3.7HG0635050.1			Dispersed
CNL	NL	Hordeum_vulgare_HORVU.MOREX.r3.7HG0635110.1			Dispersed
CNL	CN	Hordeum_vulgare_HORVU.MOREX.r3.7HG0636050.1	C	4	Proximal
CNL	CN	Hordeum_vulgare_HORVU.MOREX.r3.7HG0636070.1			Proximal
CNL	CN	Hordeum_vulgare_HORVU.MOREX.r3.7HG0636130.1			Proximal
CNL	N	Hordeum_vulgare_HORVU.MOREX.r3.7HG0636250.1			Dispersed
CNL	CN	Hordeum_vulgare_HORVU.MOREX.r3.7HG0636710.1	C	5	Proximal
CNL	NL	Hordeum_vulgare_HORVU.MOREX.r3.7HG0636740.1			Proximal
CNL	N	Hordeum_vulgare_HORVU.MOREX.r3.7HG0636780.1			Dispersed
CNL	CN	Hordeum_vulgare_HORVU.MOREX.r3.7HG0636980.1			Dispersed
CNL	CN	Hordeum_vulgare_HORVU.MOREX.r3.7HG0637000.1			Dispersed
CNL	CN	Hordeum_vulgare_HORVU.MOREX.r3.7HG0637470.1	C	2	Dispersed
CNL	CNL	Hordeum_vulgare_HORVU.MOREX.r3.7HG0637500.1			Dispersed
CNL	CN	Hordeum_vulgare_HORVU.MOREX.r3.7HG0639110.1	S	1	Dispersed
CNL	CN	Hordeum_vulgare_HORVU.MOREX.r3.7HG0639200.1	S	1	Dispersed
CNL	CNL	Hordeum_vulgare_HORVU.MOREX.r3.7HG0639690.1	C	4	Dispersed
CNL	CNL	Hordeum_vulgare_HORVU.MOREX.r3.7HG0639770.1			Proximal
CNL	CN	Hordeum_vulgare_HORVU.MOREX.r3.7HG0639810.1			Proximal
CNL	N	Hordeum_vulgare_HORVU.MOREX.r3.7HG0639870.1			Proximal
CNL	CN-DDE_Tnp_4	Hordeum_vulgare_HORVU.MOREX.r3.7HG0640550.1	C	5	Proximal
CNL	CN	Hordeum_vulgare_HORVU.MOREX.r3.7HG0640560.1			Dispersed
CNL	N	Hordeum_vulgare_HORVU.MOREX.r3.7HG0640630.1			Tandem
CNL	CN	Hordeum_vulgare_HORVU.MOREX.r3.7HG0640660.1			Proximal
CNL	CN	Hordeum_vulgare_HORVU.MOREX.r3.7HG0640700.1			Proximal
CNL	CN	Hordeum_vulgare_HORVU.MOREX.r3.7HG0644780.1	C	2	Proximal
CNL	CN	Hordeum_vulgare_HORVU.MOREX.r3.7HG0644810.1			Proximal
CNL	CNL	Hordeum_vulgare_HORVU.MOREX.r3.7HG0647490.1	S	1	Dispersed
CNL	CN	Hordeum_vulgare_HORVU.MOREX.r3.7HG0650850.1	C	4	Proximal
CNL	CN	Hordeum_vulgare_HORVU.MOREX.r3.7HG0650880.1			Proximal
CNL	CN	Hordeum_vulgare_HORVU.MOREX.r3.7HG0650990.1			Tandem
CNL	CN	Hordeum_vulgare_HORVU.MOREX.r3.7HG0651000.1			Tandem
CNL	CN	Hordeum_vulgare_HORVU.MOREX.r3.7HG0652820.1	C	11	Proximal
CNL	N	Hordeum_vulgare_HORVU.MOREX.r3.7HG0652830.1			Tandem
CNL	CNL	Hordeum_vulgare_HORVU.MOREX.r3.7HG0652840.1			Tandem
CNL	CNL	Hordeum_vulgare_HORVU.MOREX.r3.7HG0652850.1			Tandem
CNL	CNL	Hordeum_vulgare_HORVU.MOREX.r3.7HG0652860.1			Tandem
CNL	CNL	Hordeum_vulgare_HORVU.MOREX.r3.7HG0652870.1			Tandem
CNL	CNL	Hordeum_vulgare_HORVU.MOREX.r3.7HG0652880.1			Tandem
CNL	CNL	Hordeum_vulgare_HORVU.MOREX.r3.7HG0652890.1			Tandem
CNL	CNL	Hordeum_vulgare_HORVU.MOREX.r3.7HG0652910.1			Proximal
CNL	NL	Hordeum_vulgare_HORVU.MOREX.r3.7HG0652930.1			Proximal
CNL	CN	Hordeum_vulgare_HORVU.MOREX.r3.7HG0652950.1			Proximal
CNL	CN	Hordeum_vulgare_HORVU.MOREX.r3.7HG0655480.1	S	1	Dispersed
CNL	CN	Hordeum_vulgare_HORVU.MOREX.r3.7HG0657880.1	C	2	Dispersed
CNL	CN-PP2Cc	Hordeum_vulgare_HORVU.MOREX.r3.7HG0657900.1			Dispersed
CNL	CN	Hordeum_vulgare_HORVU.MOREX.r3.7HG0675570.1	C	2	Dispersed
CNL	N	Hordeum_vulgare_HORVU.MOREX.r3.7HG0675580.1			Dispersed
CNL	CNL	Hordeum_vulgare_HORVU.MOREX.r3.7HG0685700.1	S	1	Dispersed
CNL	N	Hordeum_vulgare_HORVU.MOREX.r3.7HG0690180.1	C	2	Dispersed
CNL	N	Hordeum_vulgare_HORVU.MOREX.r3.7HG0690190.1			Dispersed
CNL	CNL	Hordeum_vulgare_HORVU.MOREX.r3.7HG0712390.1	S	1	Dispersed
CNL	CN-PPP1R42	Hordeum_vulgare_HORVU.MOREX.r3.7HG0724000.1	S	1	Dispersed
CNL	CN	Hordeum_vulgare_HORVU.MOREX.r3.7HG0725910.1	S	1	Dispersed
CNL	CN	Hordeum_vulgare_HORVU.MOREX.r3.7HG0727040.1	S	1	Dispersed
CNL	CNL	Hordeum_vulgare_HORVU.MOREX.r3.7HG0728250.1	S	1	Dispersed
CNL	CN	Hordeum_vulgare_HORVU.MOREX.r3.7HG0730620.1	C	3	Proximal
CNL	CN	Hordeum_vulgare_HORVU.MOREX.r3.7HG0730650.1			Proximal
CNL	N	Hordeum_vulgare_HORVU.MOREX.r3.7HG0730710.1			Proximal
CNL	CN	Hordeum_vulgare_HORVU.MOREX.r3.7HG0731600.1	S	1	Dispersed
CNL	CN	Hordeum_vulgare_HORVU.MOREX.r3.7HG0735600.1	S	1	Dispersed
CNL	CN	Hordeum_vulgare_HORVU.MOREX.r3.7HG0739620.1	S	1	Dispersed
CNL	CNL	Hordeum_vulgare_HORVU.MOREX.r3.7HG0739910.1	S	1	Dispersed
CNL	NL	Hordeum_vulgare_HORVU.MOREX.r3.7HG0741070.1	C	6	Tandem
CNL	NL	Hordeum_vulgare_HORVU.MOREX.r3.7HG0741080.1			Tandem
CNL	CN	Hordeum_vulgare_HORVU.MOREX.r3.7HG0741090.1			Tandem
CNL	CNL	Hordeum_vulgare_HORVU.MOREX.r3.7HG0741100.1			Tandem
CNL	CNL	Hordeum_vulgare_HORVU.MOREX.r3.7HG0741110.1			Tandem
CNL	CNL	Hordeum_vulgare_HORVU.MOREX.r3.7HG0741130.1			Proximal
CNL	N	Hordeum_vulgare_HORVU.MOREX.r3.7HG0744510.1	C	2	Proximal
CNL	N	Hordeum_vulgare_HORVU.MOREX.r3.7HG0744530.1			Tandem
CNL	CN	Hordeum_vulgare_HORVU.MOREX.r3.7HG0745590.1	C	4	Dispersed
CNL	CNL	Hordeum_vulgare_HORVU.MOREX.r3.7HG0745600.1			Proximal
CNL	NL	Hordeum_vulgare_HORVU.MOREX.r3.7HG0745610.1			Proximal
CNL	CNL	Hordeum_vulgare_HORVU.MOREX.r3.7HG0745620.1			Proximal
CNL	N	Hordeum_vulgare_HORVU.MOREX.r3.7HG0746160.1	S	1	Dispersed
CNL	CN	Hordeum_vulgare_HORVU.MOREX.r3.7HG0747300.1	C	3	Proximal
CNL	CN	Hordeum_vulgare_HORVU.MOREX.r3.7HG0747380.1			Tandem
CNL	CN	Hordeum_vulgare_HORVU.MOREX.r3.7HG0747390.1			Tandem
CNL	CN	Hordeum_vulgare_HORVU.MOREX.r3.7HG0748130.1	C	2	Dispersed
CNL	CNL	Hordeum_vulgare_HORVU.MOREX.r3.7HG0748190.1			Dispersed
CNL	CN	Hordeum_vulgare_HORVU.MOREX.r3.7HG0749370.1	S	1	Dispersed
CNL	CNL	Hordeum_vulgare_HORVU.MOREX.r3.7HG0749550.1	C	5	Dispersed
CNL	CN	Hordeum_vulgare_HORVU.MOREX.r3.7HG0749590.1			Proximal
CNL	CN	Hordeum_vulgare_HORVU.MOREX.r3.7HG0749630.1			Proximal
CNL	CN	Hordeum_vulgare_HORVU.MOREX.r3.7HG0749700.1			Dispersed
CNL	CN-AvrRpt-cleavage	Hordeum_vulgare_HORVU.MOREX.r3.7HG0749740.1			Dispersed
CNL	CN	Hordeum_vulgare_HORVU.MOREX.r3.7HG0750000.1	S	1	Dispersed
CNL	CNL	Hordeum_vulgare_HORVU.MOREX.r3.7HG0750140.1	S	1	Dispersed
CNL	CN	Hordeum_vulgare_HORVU.MOREX.r3.7HG0750870.1	C	6	Dispersed
CNL	N	Hordeum_vulgare_HORVU.MOREX.r3.7HG0750880.1			Dispersed
CNL	N	Hordeum_vulgare_HORVU.MOREX.r3.7HG0750920.1			Dispersed
CNL	N	Hordeum_vulgare_HORVU.MOREX.r3.7HG0750930.1			Dispersed
CNL	CN	Hordeum_vulgare_HORVU.MOREX.r3.7HG0751060.1			Proximal
CNL	CN	Hordeum_vulgare_HORVU.MOREX.r3.7HG0751080.1			Proximal
CNL	CN	Hordeum_vulgare_HORVU.MOREX.r3.7HG0751390.1	S	1	Dispersed
CNL	CN-PPP1R42	Hordeum_vulgare_HORVU.MOREX.r3.7HG0752120.1	C	2	Proximal
CNL	CN	Hordeum_vulgare_HORVU.MOREX.r3.7HG0752170.1			Proximal
CNL	CN	Hordeum_vulgare_HORVU.MOREX.r3.7HG0752370.1	C	3	Proximal
CNL	CNL	Hordeum_vulgare_HORVU.MOREX.r3.7HG0752390.1			Proximal
CNL	CN	Hordeum_vulgare_HORVU.MOREX.r3.7HG0752400.1			Dispersed
CNL	CN	Hordeum_vulgare_HORVU.MOREX.r3.UnG0786440.1			Dispersed
